# Supplementary material for: Neuroimmune responses following joint mobilisation and manipulation in people with persistent neck pain: a protocol for a randomised placebo-controlled trial
Source: HighWire-hosted journal article supplement (doi:10.1136/bmjopen-2021-055748), 2022-03-01
Supplement: bmjopen-2021-055748supp003_data_supplement.pdf [file bmjopen-2021-055748supp003_data_supplement.pdf]

**Appendix C:** Four statements regarding the intervention expectation of the participants  
(modified from(41))

---

- I believe this intervention will allow me to get better quicker.  Strongly agree  
 Agree  
 Disagree  
 Strongly disagree
- I believe this intervention will decrease my neck pain.  Strongly agree  
 Agree  
 Disagree  
 Strongly disagree
- I believe this intervention will make me more able to do the things I want to do.  Strongly agree  
 Agree  
 Disagree  
 Strongly disagree
- This seems like a logical way to treat neck pain.  Strongly agree  
 Agree  
 Disagree  
 Strongly disagree
-
